# Supplementary material
Source: publisher figshare collection journal article supplement (https://acs.figshare.com/ndownloader/files/4687420)
Supplement: Supplementary file 1 [file 4687420]

# Design, Synthesis and Estrogenic Activity of a Novel Estrogen Receptor Modulator - a Hybrid Structure of 17 $\beta$ -Estradiol and Vitamin E in Hippocampal Neurons

Liqin Zhao,<sup>†</sup> Chunyang Jin,<sup>‡</sup> Zisu Mao,<sup>†</sup> Madathil B. Gopinathan,<sup>‡</sup> Kenneth Rehder,<sup>\*,‡</sup> and Roberta D. Brinton<sup>\*,†</sup>

<sup>†</sup> *Department of Pharmacology and Pharmaceutical Sciences, School of Pharmacy, University of Southern California, Los Angeles, California, 90089;* <sup>‡</sup> *Center for Organic and Medicinal Chemistry, RTI International, Research Triangle Park, North Carolina, 27709*

## Supporting Information

### Table of Contents

|                                                                                           |     |
|-------------------------------------------------------------------------------------------|-----|
| NMR spectra ( <sup>1</sup> H, <sup>13</sup> C, gHSQC, gHMBC, gCOSY and ROESY) of <b>2</b> | S2  |
| HRMS of <b>2</b>                                                                          | S8  |
| HPLC analysis of <b>2</b>                                                                 | S9  |
| Elemental analysis of <b>2</b>                                                            | S10 |

exp1 s2pul

| SAMPLE      |             | DEC. & VT  |          |
|-------------|-------------|------------|----------|
| date        | Jul 10 2006 | dfrq       | 125.774  |
| solvent     | CDC13       | dn         | C13      |
| file        | exp         | dpr        | 42       |
| ACQUISITION |             | dof        | 0        |
| sfrq        | 500.149     | dm         | nmn      |
| tn          | H1          | dmm        | c        |
| at          | 1.851       | dmf        | 200      |
| np          | 14734       | dseq       | 1.       |
| sw          | 3895.6      | dres       | n        |
| fb          | not used    | homo       |          |
| bs          | 4           | DEC2       |          |
| tpwr        | 63          | dfrq2      | 0        |
| pw          | 3.0         | dn2        | 1        |
| d1          | 0           | dpr2       | 0        |
| tof         | -642.1      | dm2        | n        |
| nt          | 8           | dmf2       | c        |
| ct          | 8           | dmm2       | 200      |
| alock       | n           | dses2      | 1.0      |
| gain        | 10          | dres2      | n        |
| FLAGS       |             | homo2      |          |
| il          | n           | PROCESSING |          |
| in          | n           | wtfle      | ft       |
| dp          | y           | proc       | not used |
| hs          | nn          | fn         | f        |
| DISPLAY     |             | math       |          |
| sp          | -102.6      | werr       |          |
| wp          | 3895.1      | wexp       |          |
| vs          | 165         | wbs        |          |
| sc          | 0           | wnt        | wft      |
| wc          | 250         |            |          |
| hzmm        | 15.58       |            |          |
| ls          | 1907.35     |            |          |
| rfl         | 103.1       |            |          |
| rff         | 0           |            |          |
| th          | 7           |            |          |
| ins         | 100.000     |            |          |
| nm          | ph          |            |          |

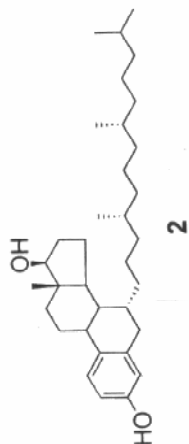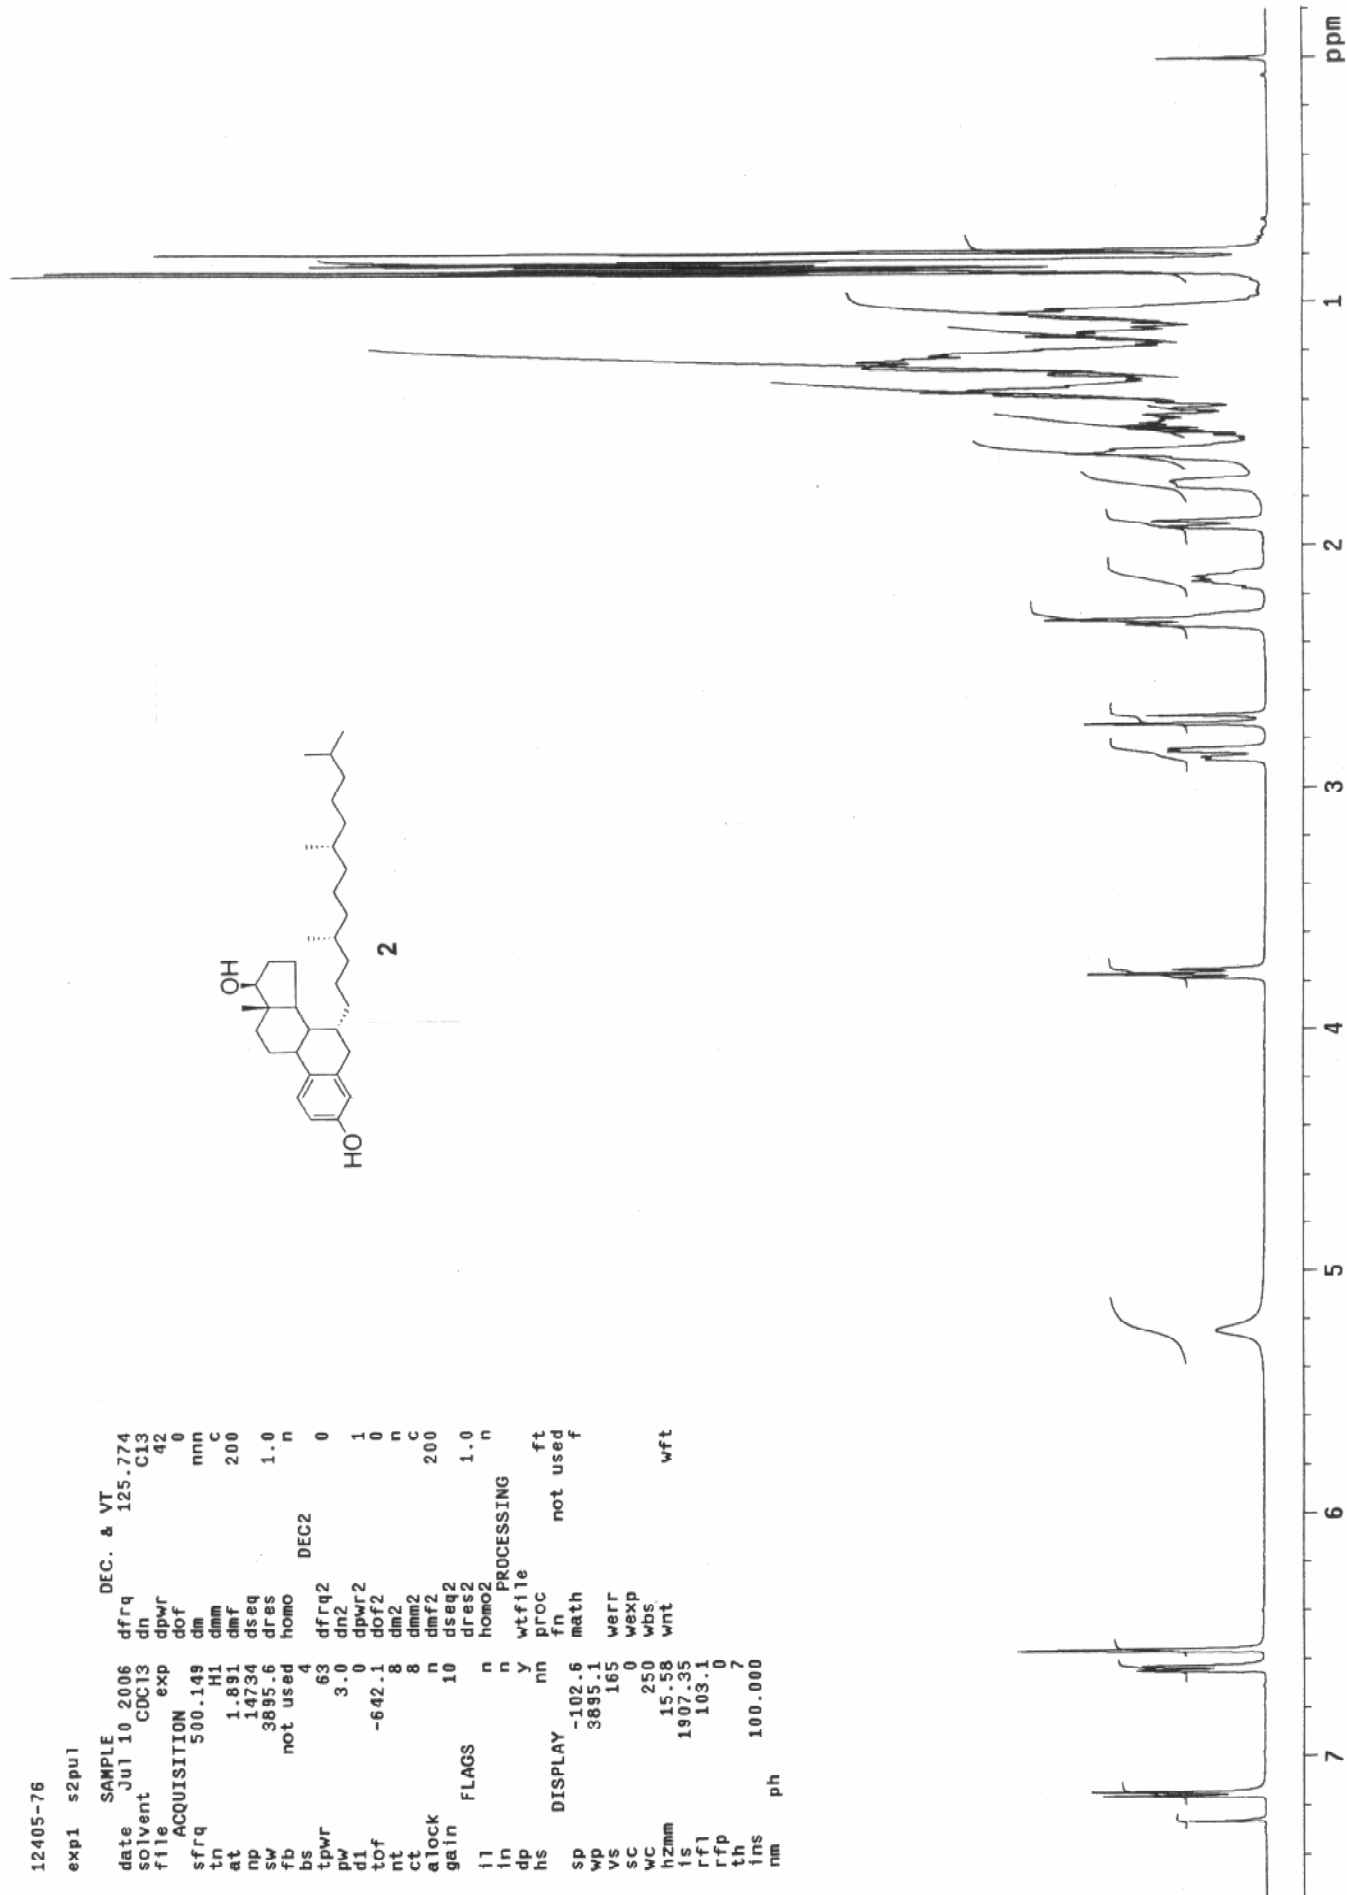

12405-76

exp2 s2pul

|             |             |            |          |
|-------------|-------------|------------|----------|
| SAMPLE      |             | DEC. & VT  |          |
| date        | Jul 10 2006 | dfrq       | 500.150  |
| solvent     | CDCl3       | dn         | H1       |
| file        | exp         | dpwr       | 38       |
| ACQUISITION |             | dof        | 0        |
| sfrq        | 125.772     | dm         | YYY      |
| tn          | C13         | dm         | W        |
| at          | 1.303       | dmf        | 12048    |
| np          | 5254        | dseq       |          |
| sw          | 20050.1     | dres       | 1.0      |
| fb          | not used    | homo       | n        |
| bs          | 4           | DEC2       |          |
| tpwr        | 60          | dfrq2      | 0        |
| pw          | 3.0         | dn2        |          |
| d1          | 0           | dpwr2      | 1        |
| tof         | -2221.7     | dof2       | 0        |
| nt          | 1000        | dm2        | n        |
| ct          | 1000        | dm2        | c        |
| alock       | n           | dmf2       | 10000    |
| gain        | 20          | dseq2      |          |
| FLAGS       |             | dres2      | 1.0      |
| ll          | n           | homo2      | n        |
| in          | n           | PROCESSING |          |
| dp          | nn          | lb         | 1.00     |
| hs          | y           | wf1        |          |
| DISPLAY     |             | proc       | ft       |
| sp          | -308.0      | fn         | not used |
| wp          | 20048.5     | math       | f        |
| vs          | 200         | werr       |          |
| sc          | 0           | wexp       |          |
| wc          | 250         | wbs        |          |
| hzm         | 80.20       | wnt        |          |
| is          | 500.00      |            |          |
| rfl         | 308.7       |            |          |
| rff         | 0           |            |          |
| th          | 5           |            |          |
| ins         | 100.000     |            |          |
| nm          | ph          |            |          |

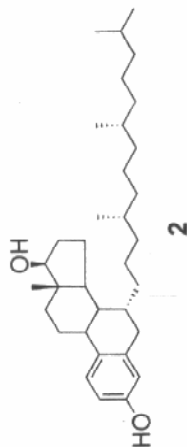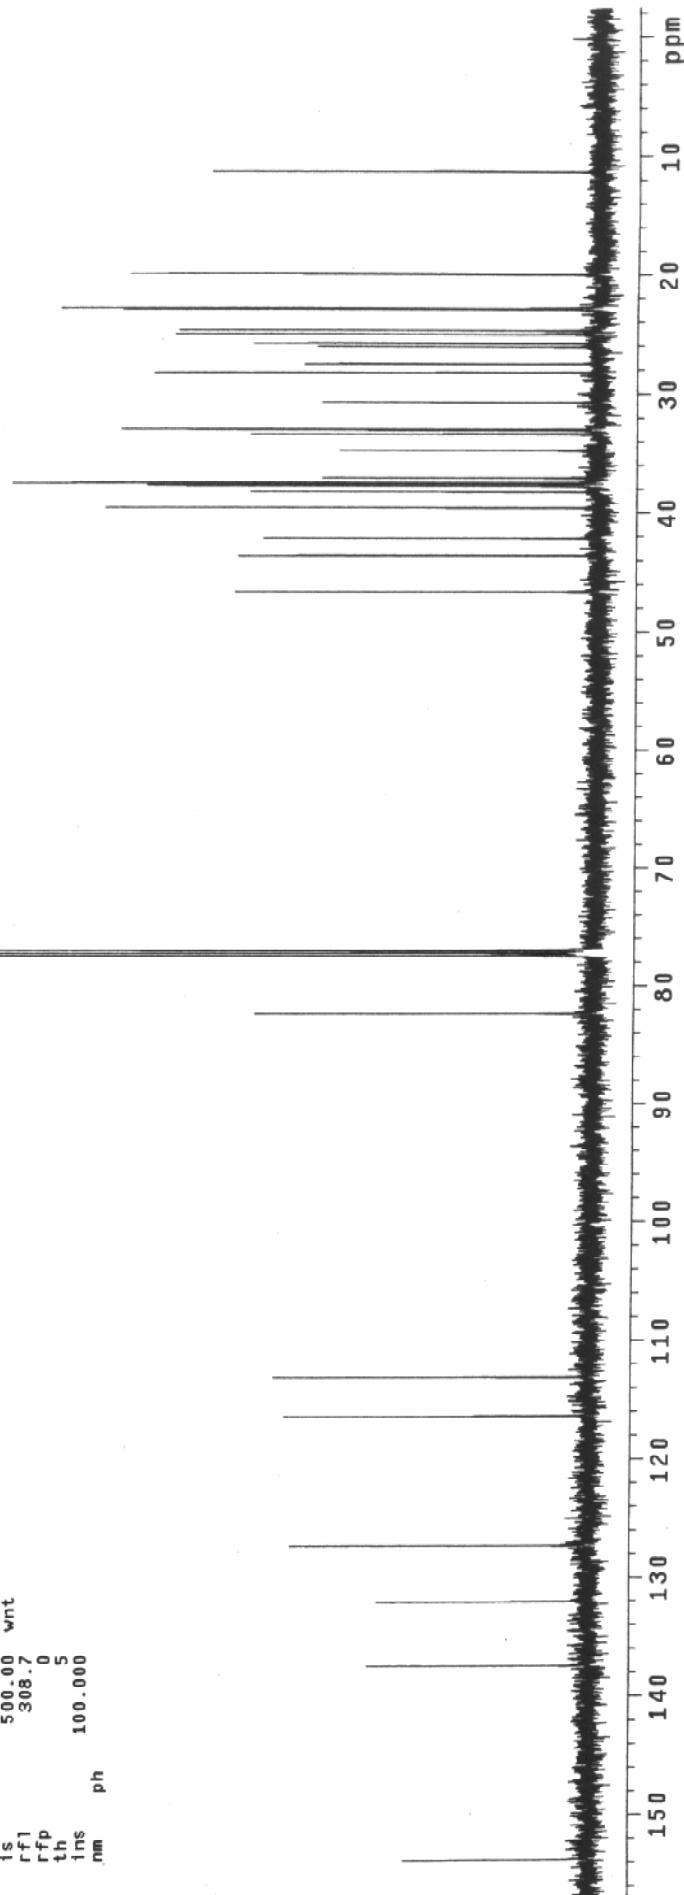

12405-76

Pulse Sequence: gHSQC

Solvent: CDCl<sub>3</sub>

Ambient temperature

User: 1-14-87

INOVA-500 "tesla"

Relax. delay 1.000 sec

Acq. time 0.131 sec

Width 3885.6 Hz

2D Width 20050.1 Hz

32 repetitions

2 x 128 increments

OBSERVE H1, 500.1472535 MHz

DECOUPLE C13, 125.7718205 MHz

Power 43 dB

on during acquisition

off during delay

W40\_1d 8182 modulated

DATA PROCESSING

Gauss apodization 0.061 sec

F1 DATA PROCESSING

Gauss apodization 0.011 sec

FT size 1024 x 2048

Total time 2 hr, 44 min, 53 sec

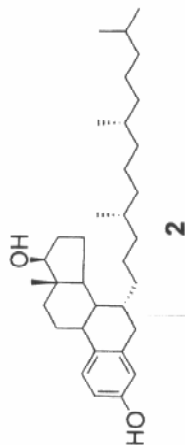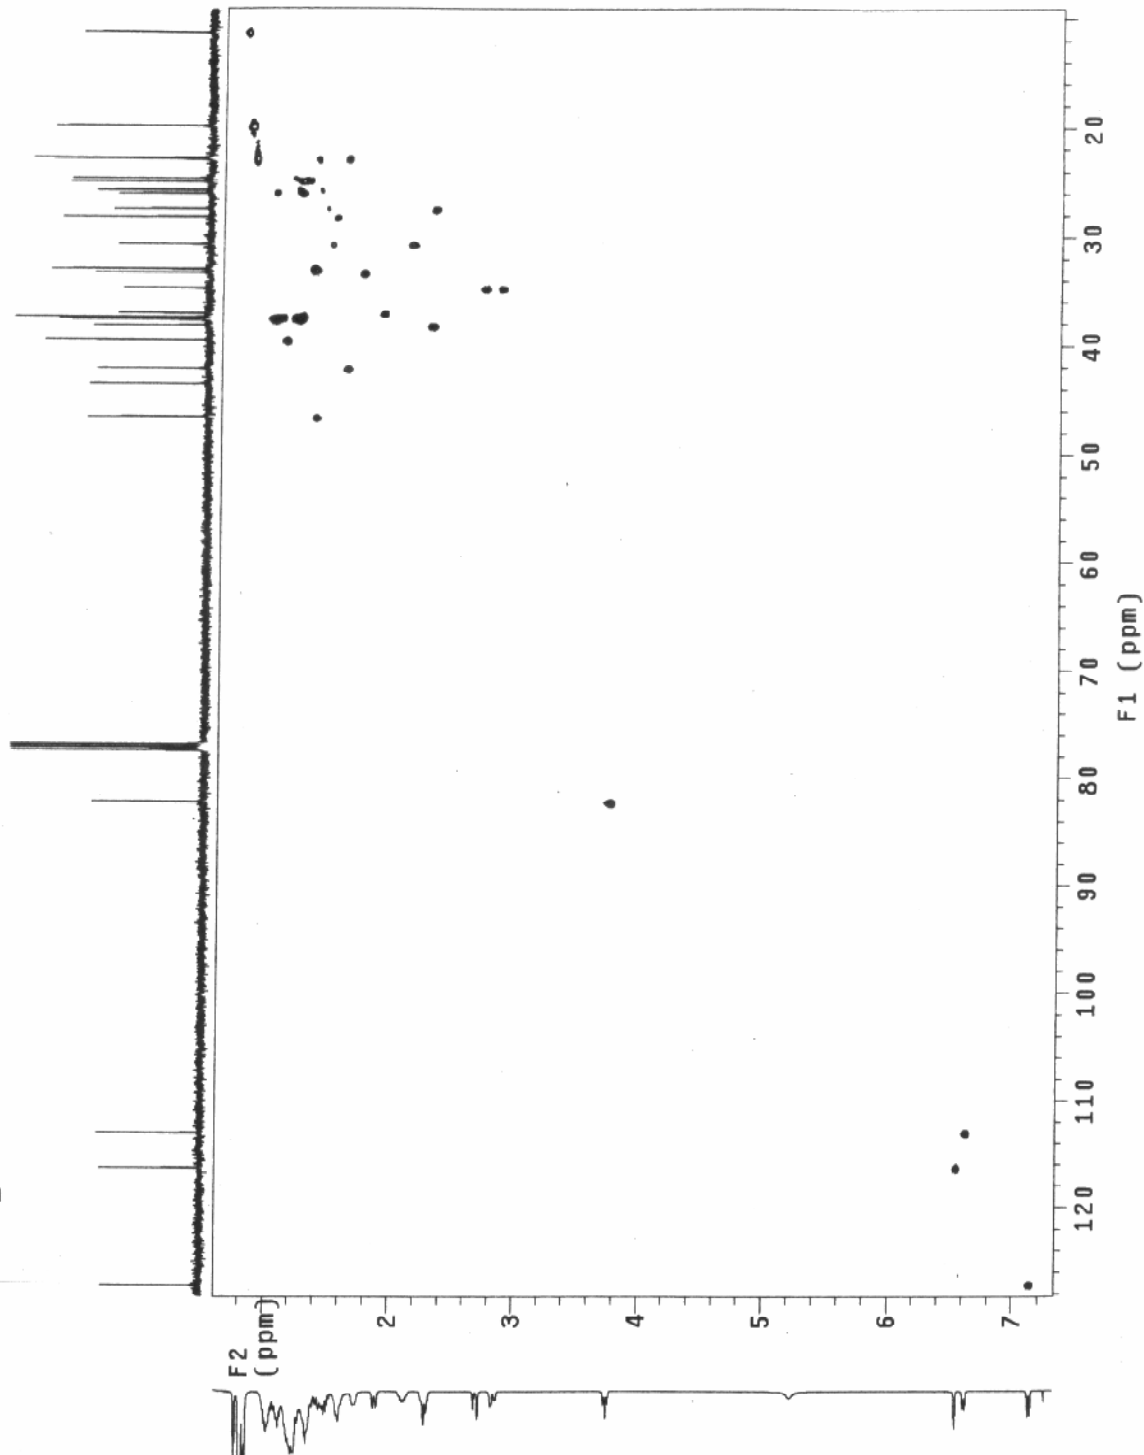

12405-76

Pulse Sequence: gHMBC

Solvent: CDCl<sub>3</sub>

Ambient temperature

User: 1-14-87

INOVA-500 "tesla"

Relax. delay 1.000 sec

Acq. time 0.131 sec

Width 3895.6 Hz

20 Width 20050.1 Hz

64 repetitions

400 increments

OBSERVE H1, 500.1472538 MHz

DATA PROCESSING

Sine bell 0.066 sec

F1 DATA PROCESSING

Sine bell 0.007 sec

FI size 1024 x 2048

Total time 8 hr, 42 min, 31 sec

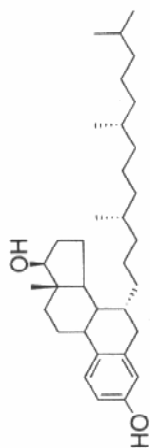

2

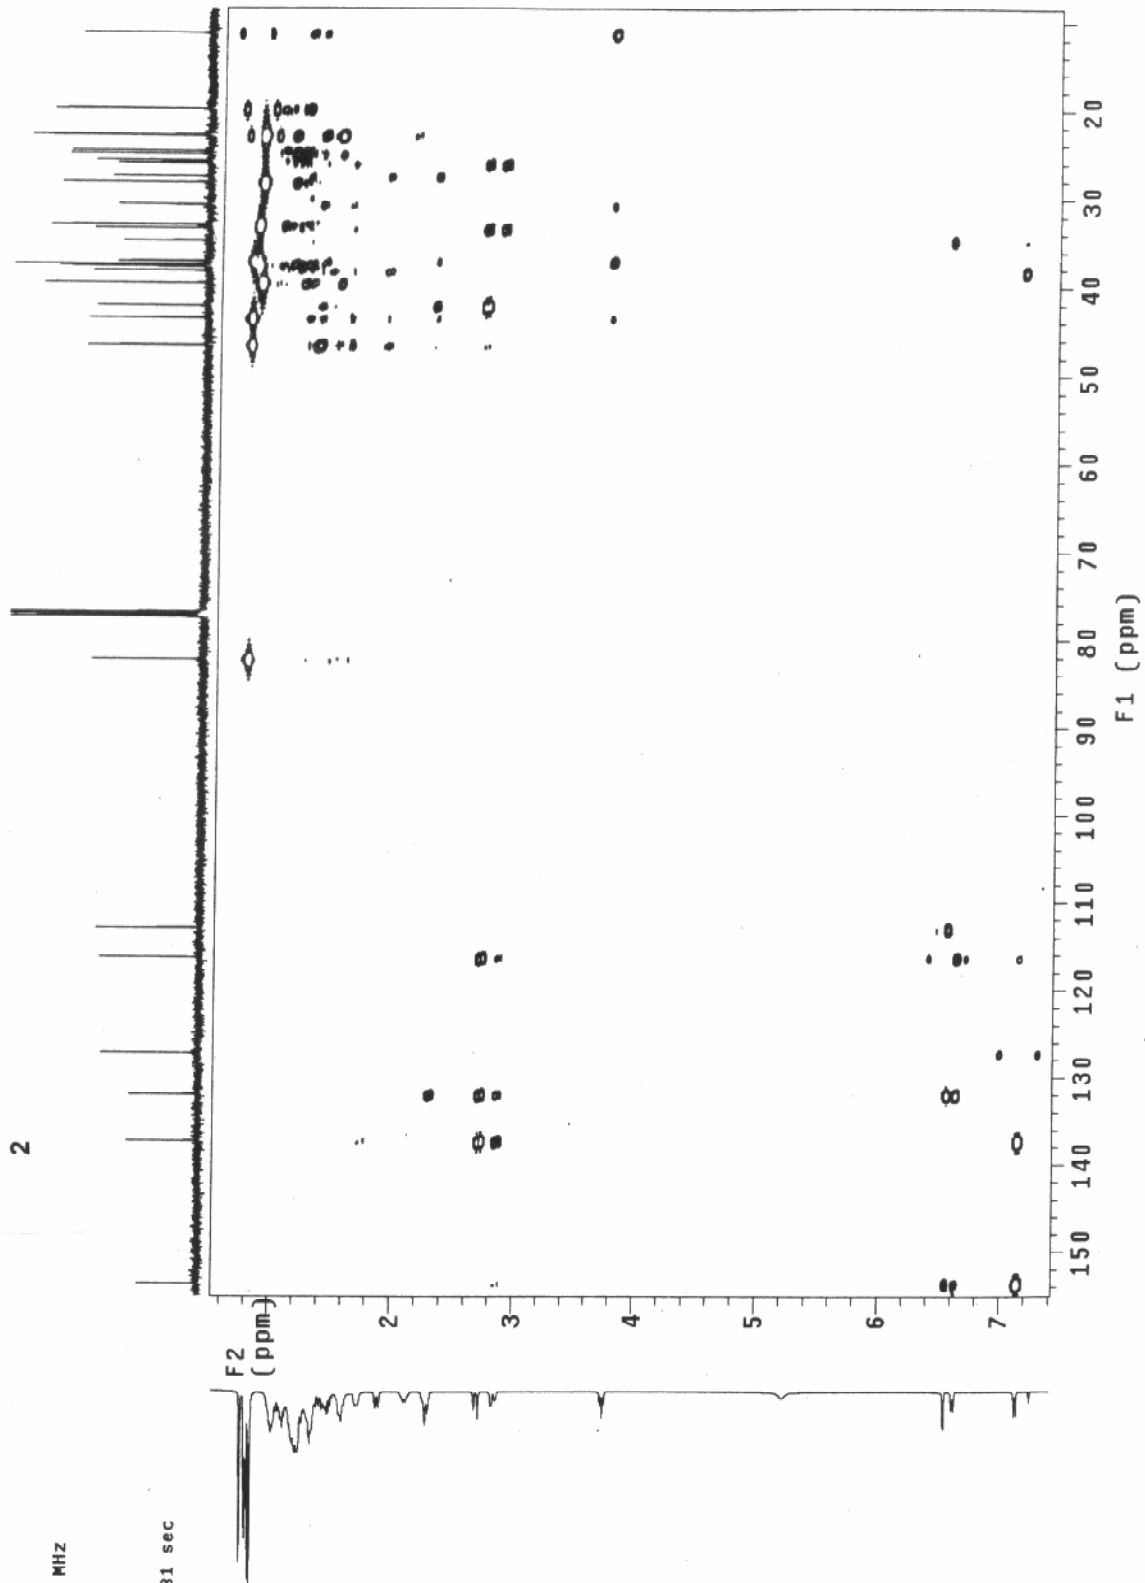

12405-76

Pulse Sequence: gCOSY

Solvent: CDCl<sub>3</sub>

Ambient temperature

INOVA-500 "tesla"

Relax. delay 1.000 sec

Acq. time 0.131 sec

Width 3895.6 Hz

2D Width 3895.6 Hz

16 repetitions

128 increments

OBSERVE H1 500.1472543 MHz

DATA PROCESSING

Sq. sine bell 0.066 sec

F1 DATA PROCESSING

Sq. sine bell 0.033 sec

FT size 1024 x 1024

Total time 39 min, 55 sec

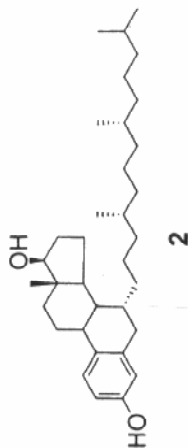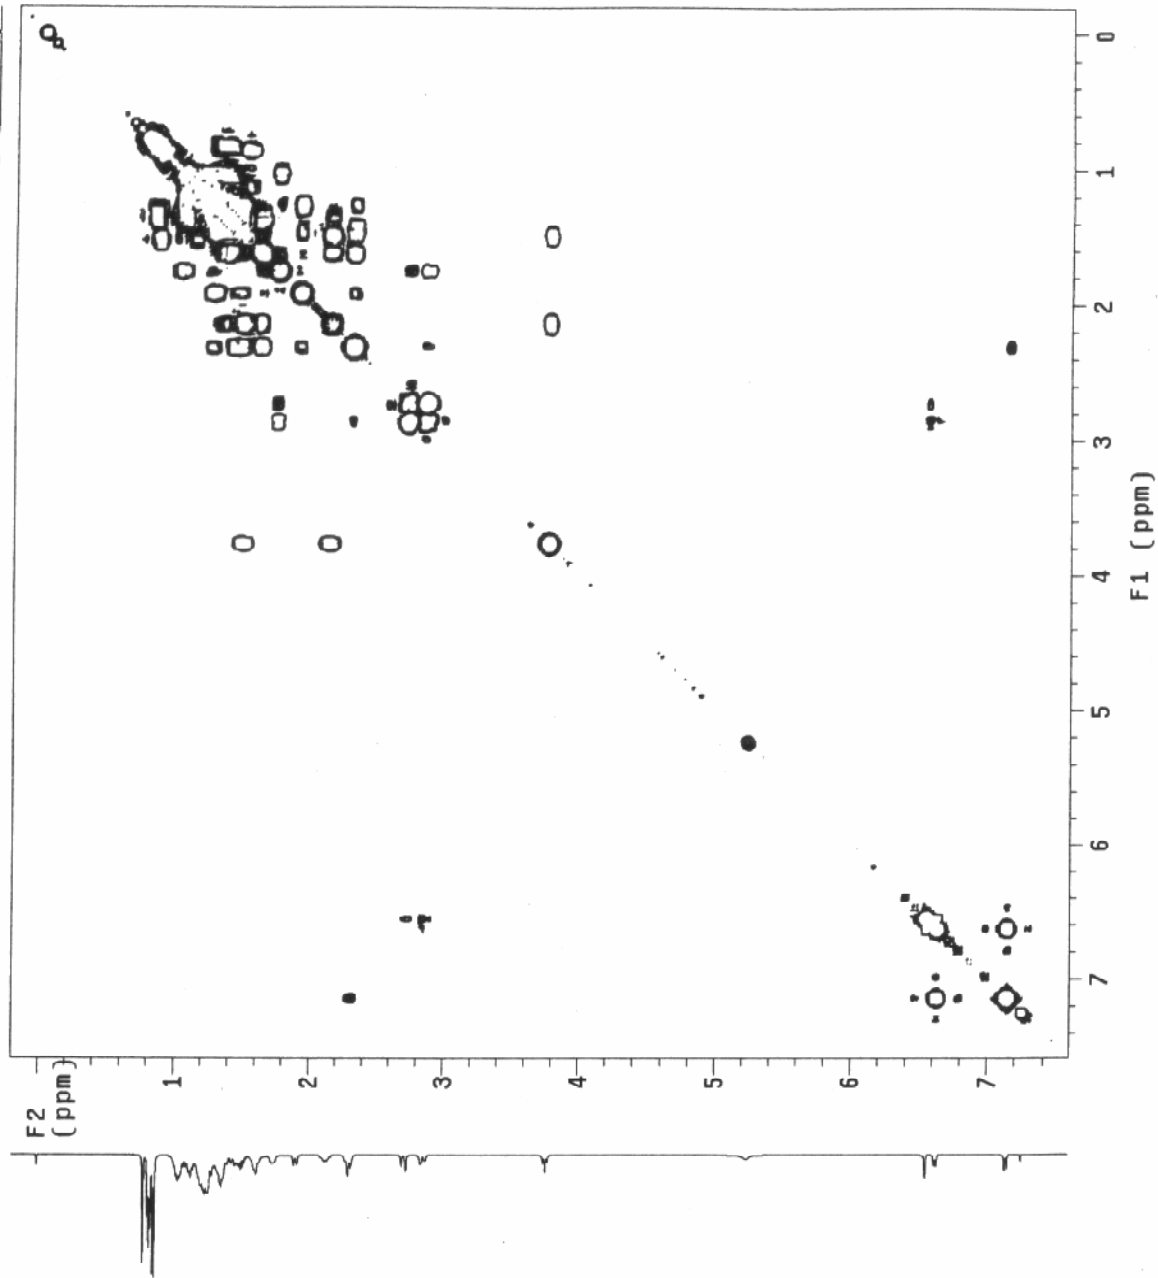

12405-76 ROESY

Pulse Sequence: ROESY  
Solvent: CDCl<sub>3</sub>  
Ambient temperature  
INOVA-500 "tesla"

Relax. delay 1.000 sec  
Mixing 0.400 sec  
Acq. time 0.131 sec  
Width 3895.6 Hz  
20 Width 3895.6 Hz  
64 repetitions  
2 x 200 increments  
OBSERVE H1, 500.1472510 MHz  
DATA PROCESSING  
Gauss apodization 0.061 sec  
F1 DATA PROCESSING  
Gauss apodization 0.047 sec  
FT size 2048 x 2048  
Total time 11 hr, 12 min, 20 sec

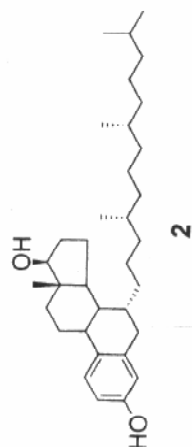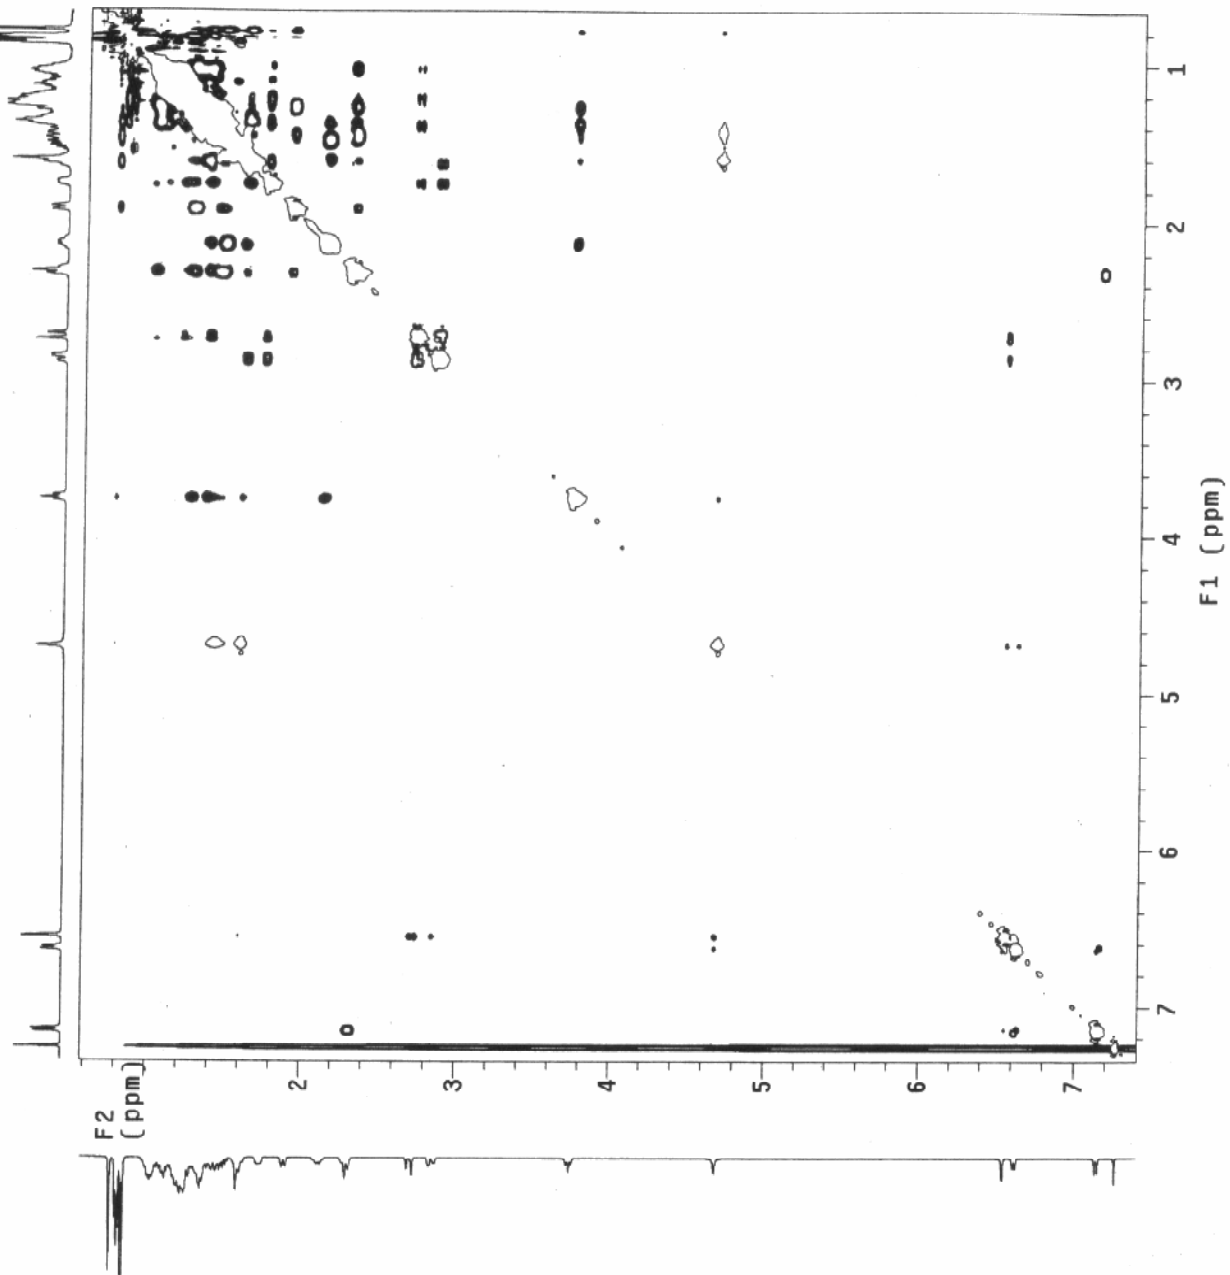

RTI-12405-76 Electrospray with Na+ added

RTI-12405-76\_Na\_HR 16 (0.294) Cn (Cen,7, 50.00, Ht); Sb (15,40.00 ); Sm (SG, 3x7.00); Cm (1:115)  
519.4182

Voltage ES+  
25.4

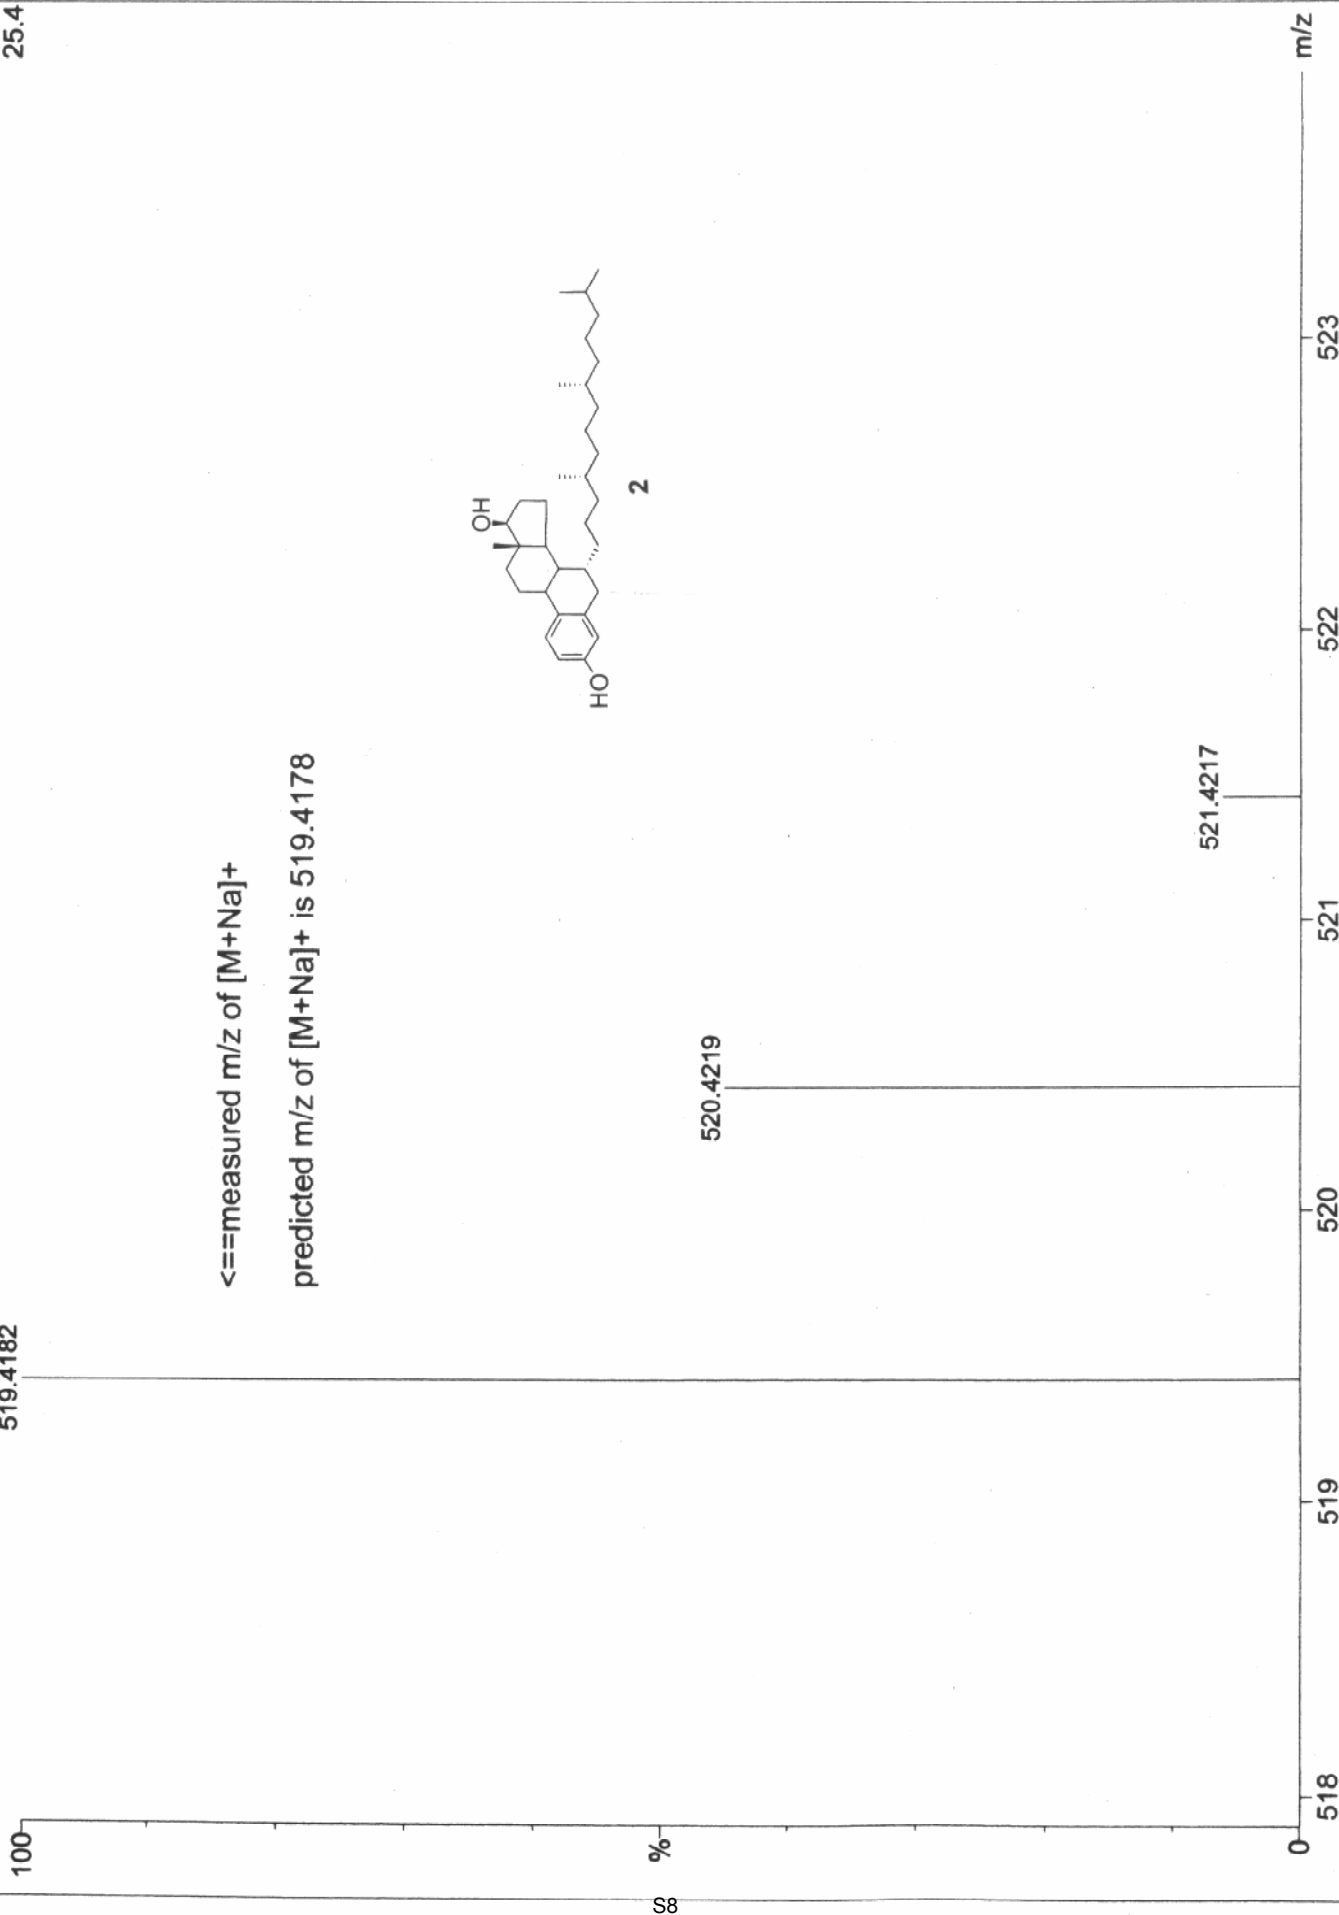



**Method Notes**

X Terra MS C-18, 5 um, 3.9x150 mm column

90% MeOH - 10% Water

1 ml/min

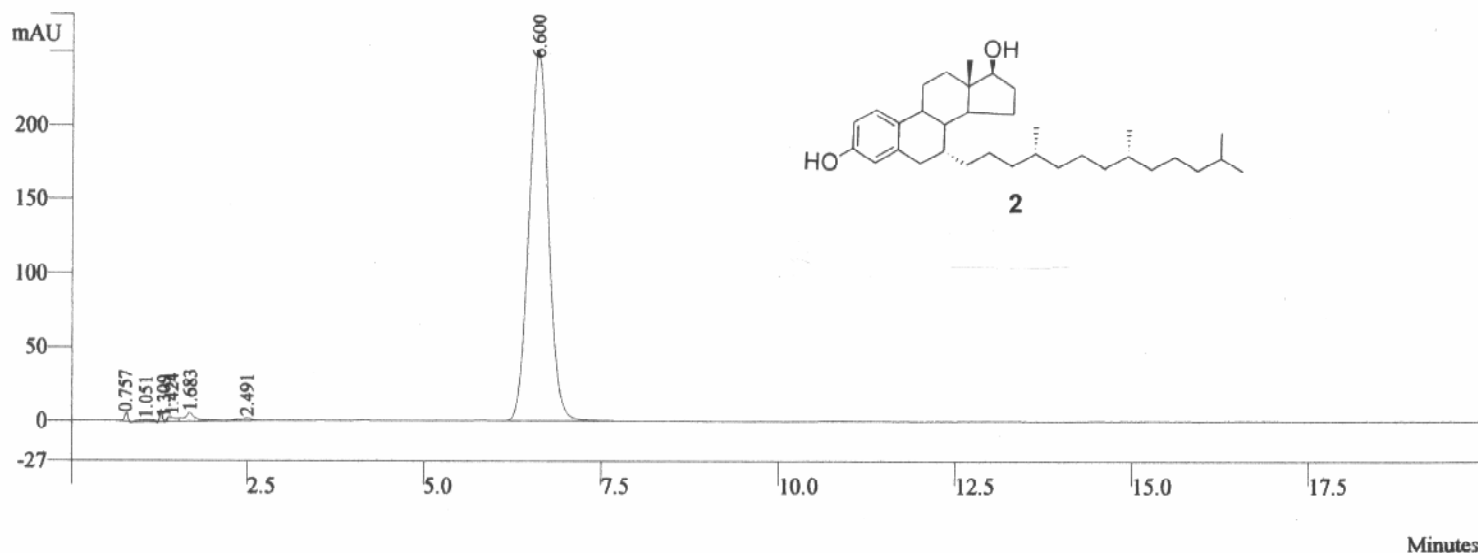

| Peak No | Result (%) | Ret Time (min) | Rel Ret Time | Sep. Code | Width 1/2 (sec) | Peak Area (counts) | Peak Height (counts) |
|---------|------------|----------------|--------------|-----------|-----------------|--------------------|----------------------|
| 1       | 0.3963     | 0.757          | 0.00         | BP        | 1.6             | 100220             | 24744                |
| 2       | 0.3345     | 1.051          | 0.00         | PV        | 0.0             | 84594              | 5340                 |
| 3       | 0.4255     | 1.309          | 0.00         | VV        | 8.3             | 107619             | 9401                 |
| 4       | 0.4922     | 1.424          | 0.00         | VV        | 0.0             | 124483             | 15429                |
| 5       | 1.3364     | 1.683          | 0.00         | VV        | 7.0             | 337969             | 27454                |
| 6       | 0.4632     | 2.491          | 0.00         | VB        | 7.7             | 117148             | 9775                 |
| 7       | 96.5518    | 6.600          | 0.00         | BB        | 17.8            | 24417822           | 1278387              |
| 99.9999 |            |                |              |           |                 | 25289856           | 1370530              |

Data File: c:\star\chunyang's  
Channel: 3 = 280.00 nm RESULTS  
Sample ID: 12405-79f  
Operator (Inj): CJIN  
Injection Date: 07/17/06 03:23:13 PM  
Injection Method: c:\star\chunyang's method\95%  
Run Time (min): 20.000  
Workstation: W98  
Instrument (Inj): Star HPLC system 1

Operator (Calc): CJIN  
Calc Date: 07/17/06 03:43:21 PM  
Times Calculated: 1  
Calculation Method: c:\star\chunyang's method\95%  
Instrument (Calc): Star HPLC system 1  
Run Mode: Analysis  
Peak Measurement: Peak Area  
Calculation Type: Percent  
Calibration Level: N/A  
Verification Tolerance: N/A

Elemental analysis of **2**.

| Compound | Formula                                                             | Calculated |       | Found |       |
|----------|---------------------------------------------------------------------|------------|-------|-------|-------|
|          |                                                                     | C          | H     | C     | H     |
| <b>2</b> | $\text{C}_{34}\text{H}_{56}\text{O}_2 \cdot 0.25\text{H}_2\text{O}$ | 81.46      | 11.36 | 81.51 | 11.35 |
